# Supplementary material for: Associations of sociodemographic and behavioral factors with frailty transition patterns: a multi-state Markov analysis of the China Health and Retirement Longitudinal Study (CHARLS)
Source: Research Square preprint supplement (doi:10.21203/rs.3.rs-8149868/v1), 2025-12-22
Supplement: Supplementary file 1 [file 4872208c6766f86d4e125ab6.docx]

**Supplementary appendix**

**Associations of sociodemographic and behavioral factors with frailty transition patterns: a multi-state Markov analysis of the China Health and Retirement Longitudinal Study (CHARLS)**

Page 1: Text 1 Supplementary materials

Page 2-3: Table S1 Construction of 35-item frailty index

Page 3: Table S2 The number of transitions between states

Page 4: Table S3 Transition intensity and mean sojourn time of frailty states

Page 4: Table S4 Transition probabilities of frailty states within 1, 3, 5, and 10-year observation intervals in different age groups

Page 5: Table S5 Transition probabilities of frailty states within 1, 3, 5, and 10-year observation intervals in different gender groups

Page 6: Table S6 Hazard radios and 95% confidence intervals of covariates on transitions among frailty states transitions in 45-60 years

Page 7: Table S7 Hazard radios and 95% confidence intervals of covariates on transitions among frailty states transitions over 60 years

Page 8: Table S8 Hazard radios and 95% confidence intervals of covariates on transitions among frailty states transitions in males

Page 9: Table S9 Hazard radios and 95% confidence intervals of covariates on transitions among frailty states transitions in females

Page 10: Figure S1 Multi-state Markov model evaluation diagrams

Text 1 Supplementary materials

In the 'others' category of marital status, it includes married but not living with spouse temporarily for reasons such as work, separated, divorced, widowed, and never married.

Some common parameters of MSM models are as follows [1]. Briefly, transition intensity represents the instantaneous risk of transitioning from one state to another; whereas transition probability is the probability of moving from one state to another over a finite time period. The mean sojourn time represents the average time a person remained in a given state. Transient states allow individuals to transfer bi-directionally between adjacent states, whereas once in an absorbing state, individuals will no longer be able to undergo state transfer.

[1] Shi S Y, Zhao H Y, Liu Z K, et al. Development of diabetic complications and influencing factors among 32653 type 2 diabetes patients: retrospective cohort study using a multi-state Markov model[J].

Table S1 Construction of 35-item frailty index

| Item number | Item definition | Cut point |
| --- | --- | --- |
| 1 | Self-reported physician diagnosed hypertension | Yes = 1, No = 0 |
| 2 | Self-reported physician diagnosed dyslipidemia | Yes = 1, No = 0 |
| 3 | Self-reported physician diagnosed heart disease | Yes = 1, No = 0 |
| 4 | Self-reported physician diagnosed stroke | Yes = 1, No = 0 |
| 5 | Self-reported physician diagnosed cancer | Yes = 1, No = 0 |
| 6 | Self-reported physician diagnosed arthritis | Yes = 1, No = 0 |
| 7 | Self-reported physician diagnosed chronic lung disease | Yes = 1, No = 0 |
| 8 | Self-reported physician diagnosed asthma | Yes = 1, No = 0 |
| 9 | Self-reported physician diagnosed any emotional, nervous, or psychiatric problems | Yes = 1, No = 0 |
| 10 | Self-reported physician diagnosed memory-related disease | Yes = 1, No = 0 |
| 11 | Self-reported physician diagnosed liver disease | Yes = 1, No = 0 |
| 12 | Self-reported physician diagnosed kidney disease | Yes = 1, No = 0 |
| 13 | Self-reported physician diagnosed diabetes or high blood sugar | Yes = 1, No = 0 |
| 14 | Self-reported physician diagnosed stomach or other digestive disease | Yes = 1, No = 0 |
| 15 | Self-reported general health status | Fair, poor, very poor=1, very good, good=0 |
| 16 | Difficulty with dressing | Yes = 1, No = 0 |
| 17 | Difficulty with bathing or showering | Yes = 1, No = 0 |
| 18 | Difficulty with eating | Yes = 1, No = 0 |
| 19 | Difficulty with getting in and out of bed | Yes = 1, No = 0 |
| 20 | Difficulty with using the toilet | Yes = 1, No = 0 |
| 21 | Difficulty with managing money | Yes = 1, No = 0 |
| 22 | Difficulty with taking medications | Yes = 1, No = 0 |
| 23 | Difficulty with shopping for groceries | Yes = 1, No = 0 |
| 24 | Difficulty with preparing meals | Yes = 1, No = 0 |
| 25 | Difficulty with doing housework | Yes = 1, No = 0 |
| 26 | Difficulty with controlling urination and defecation | Yes = 1, No = 0 |
| 27 | Bothered by things | Occasionally or a moderate, 5-7 days per week=1, < 1 day, 1-2 days per week=0 |
| 28 | Had trouble keeping mind | Occasionally or a moderate, 5-7 days per week=1, < 1 day, 1-2 days per week=0 |

Continuation of Table S1

| 29 | Felt depressed | Occasionally or a moderate, 5-7 days per week=1, < 1 day, 1-2 days per week=0 |
| --- | --- | --- |
| 30 | I felt everything I did was an effort | Occasionally or a moderate, 5-7 days per week=1, < 1 day, 1-2 days per week=0 |
| 31 | I felt hopeful about the future | Occasionally or a moderate, 5-7 days per week=1, < 1 day, 1-2 days per week=0 |
| 32 | I felt fearful | Occasionally or a moderate, 5-7 days per week=1, < 1 day, 1-2 days per week=0 |
| 33 | I was happy | Occasionally or a moderate, 5-7 days per week=1, < 1 day, 1-2 days per week=0 |
| 34 | I felt lonely | Occasionally or a moderate, 5-7 days per week=1, < 1 day, 1-2 days per week=0 |
| 35 | I could not get on | Occasionally or a moderate, 5-7 days per week=1, < 1 day, 1-2 days per week=0 |

Table S2 The number of transitions between states

| From | To, n (%) | | | |
| --- | --- | --- | --- | --- |
| Robust | Prefrailty | Frailty | Death |
| Robust | 9023 (55.2) | 6268 (38.4) | 688 (4.2) | 364 (2.2) |
| Prefrailty | 5404 (18.3) | 17789 (60.1) | 5423 (18.3) | 969 (3.3) |
| Frailty | 375 (3.1) | 3691 (30.3) | 7166 (58.8) | 960 (7.9) |

Table S3 Transition intensity and mean sojourn time of frailty states

| From | To, transition intensity (95%CI) | | | |  | Mean sojourn time (year)  (95%CI) |
| --- | --- | --- | --- | --- | --- | --- |
| Robust | Prefrailty | Frailty | Death |  |
| Robust | −0.308 (−0.316, −0.300) | 0.301 (0.293, 0.309) | 0 | 0.007 (0.006, 0.009) |  | 3.247 (3.162, 3.335) |
| Prefrailty | 0.146 (0.142, 0.151) | −0.292 (−0.298, −0.286) | 0.136 (0.132, 0.139) | 0.010 (0.009, 0.012) |  | 3.425 (3.355, 3.496) |
| Frailty | 0 | 0.217 (0.210, 0.224) | −0.258 (−0.265, −0.250) | 0.041 (0.038, 0.044) |  | 3.880 (3.763, 3.999) |

Table S4 Transition probabilities of frailty states within 1, 3, 5, and 10-year observation intervals in different age groups

|  | 1-year | | | |  | 3-year | | | |  | 5-year | | | | |  | | 10-year | | | | |
| --- | --- | --- | --- | --- | --- | --- | --- | --- | --- | --- | --- | --- | --- | --- | --- | --- | --- | --- | --- | --- | --- | --- |
|  | Robust | Prefrailty | Frailty | Death |  | Robust | Prefrailty | Frailty | Death |  | Robust | Prefrailty | Frailty | Death |  | | Robust | | Prefrailty | Frailty | Death |
| 45-60 |  |  |  |  |  |  |  |  |  |  |  |  |  |  |  | |  | |  |  |  |
| Robust | 0.767 | 0.217 | 0.013 | 0.003 |  | 0.511 | 0.407 | 0.071 | 0.011 |  | 0.391 | 0.462 | 0.125 | 0.021 |  | | 0.286 | | 0.471 | 0.193 | 0.050 |
| Prefrailty | 0.117 | 0.785 | 0.093 | 0.005 |  | 0.220 | 0.585 | 0.179 | 0.017 |  | 0.250 | 0.513 | 0.208 | 0.029 |  | | 0.255 | | 0.467 | 0.218 | 0.061 |
| Frailty | 0.014 | 0.189 | 0.782 | 0.014 |  | 0.078 | 0.364 | 0.521 | 0.037 |  | 0.138 | 0.422 | 0.385 | 0.055 |  | | 0.212 | | 0.443 | 0.253 | 0.091 |
| ≥60 |  |  |  |  |  |  |  |  |  |  |  |  |  |  |  | |  | |  |  |  |
| Robust | 0.712 | 0.248 | 0.021 | 0.019 |  | 0.415 | 0.417 | 0.104 | 0.063 |  | 0.285 | 0.432 | 0.172 | 0.112 |  | | 0.169 | | 0.363 | 0.227 | 0.241 |
| Prefrailty | 0.098 | 0.755 | 0.124 | 0.023 |  | 0.165 | 0.526 | 0.230 | 0.079 |  | 0.171 | 0.435 | 0.257 | 0.137 |  | | 0.144 | | 0.342 | 0.241 | 0.273 |
| Frailty | 0.010 | 0.147 | 0.785 | 0.058 |  | 0.049 | 0.273 | 0.527 | 0.151 |  | 0.081 | 0.306 | 0.390 | 0.223 |  | | 0.107 | | 0.287 | 0.244 | 0.361 |

Table S5 Transition probabilities of frailty states within 1, 3, 5, and 10-year observation intervals in different gender groups

|  | 1-year | | | |  | 3-year | | | |  | 5-year | | | | |  | | 10-year | | | | |
| --- | --- | --- | --- | --- | --- | --- | --- | --- | --- | --- | --- | --- | --- | --- | --- | --- | --- | --- | --- | --- | --- | --- |
|  | Robust | Prefrailty | Frailty | Death |  | Robust | Prefrailty | Frailty | Death |  | Robust | Prefrailty | Frailty | Death |  | | Robust | | Prefrailty | Frailty | Death |
| Male |  |  |  |  |  |  |  |  |  |  |  |  |  |  |  | |  | |  |  |  |
| Robust | 0.768 | 0.211 | 0.012 | 0.009 |  | 0.511 | 0.392 | 0.063 | 0.033 |  | 0.389 | 0.440 | 0.108 | 0.063 |  | | 0.273 | | 0.423 | 0.154 | 0.149 |
| Prefrailty | 0.118 | 0.779 | 0.087 | 0.016 |  | 0.220 | 0.567 | 0.159 | 0.054 |  | 0.247 | 0.483 | 0.177 | 0.093 |  | | 0.237 | | 0.407 | 0.168 | 0.188 |
| Frailty | 0.014 | 0.180 | 0.753 | 0.054 |  | 0.074 | 0.330 | 0.463 | 0.133 |  | 0.126 | 0.366 | 0.316 | 0.191 |  | | 0.179 | | 0.348 | 0.178 | 0.294 |
| Female |  |  |  |  |  |  |  |  |  |  |  |  |  |  |  | |  | |  |  |  |
| Robust | 0.728 | 0.247 | 0.020 | 0.006 |  | 0.442 | 0.433 | 0.105 | 0.020 |  | 0.316 | 0.467 | 0.180 | 0.038 |  | | 0.207 | | 0.437 | 0.263 | 0.093 |
| Prefrailty | 0.102 | 0.769 | 0.122 | 0.007 |  | 0.179 | 0.558 | 0.235 | 0.028 |  | 0.193 | 0.481 | 0.274 | 0.052 |  | | 0.180 | | 0.421 | 0.285 | 0.114 |
| Frailty | 0.011 | 0.161 | 0.800 | 0.028 |  | 0.057 | 0.311 | 0.560 | 0.072 |  | 0.098 | 0.362 | 0.433 | 0.107 |  | | 0.143 | | 0.376 | 0.304 | 0.176 |

Table S6 Hazard radios and 95% confidence intervals of covariates on transitions among frailty states transitions in 45-60 years

| Covariates | Recovery transition | |  | Deteriorate transition | |  | Death transition | | |
| --- | --- | --- | --- | --- | --- | --- | --- | --- | --- |
| Prefrailty→Robust | Frailty→Prefrailty |  | Robust→Prefrailty | Prefrailty→Frailty |  | Robust→Death | Prefrailty→Death | Frailty→Death |
| Age, continuous | **0.976**  **(0.969,0.984)** | **0.982**  **(0.973,0.991)** |  | 1.007  (0.999,1.013) | **1.022**  **(1.014,1.030)** |  | 0.991  (0.919,1.069) | **1.082**  **(1.033,1.133)** | **1.049**  **(1.014,1.085)** |
| Gender (ref = Male) | |  |  |  |  |  |  |  |  |
| Female | **0.799**  **(0.709,0.900)** | **0.835**  **(0.722,0.965)** |  | **1.364**  **(1.218,1.528)** | **1.406**  **(1.229,1.609)** |  | 0.333  (0.082,1.349) | **0.280**  **(0.118,0.661)** | **0.437**  **(0.261,0.733)** |
| Residence areas (ref = Urban) | |  |  |  |  |  |  |  |  |
| Rural | **1.178**  **(1.089,1.274)** | 1.018  (0.922,1.124) |  | **1.158**  **(1.078,1.243)** | **1.348**  **(1.237,1.469)** |  | 1.747  (0.650,4.693) | 0.899  (0.529,1.529) | 0.904  (0.621,1.317) |
| Marital status (ref = Married) | |  |  |  |  |  |  |  |  |
| Others* | 0.912  (0.814,1.023) | **0.841**  **(0.742,0.954)** |  | 0.999  (0.900,1.109) | 1.045  (0.938,1.163) |  | 1.446  (0.500,4.182) | 1.483  (0.776,2.833) | 0.915  (0.589,1.420) |
| Highest educational levels (ref = Literate) | | |  |  |  |  |  |  |  |
| Illiterate | **1.263**  **(1.138,1.403)** | 0.939  (0.841,1.048) |  | 1.013  (0.918,1.117) | **1.272**  **(1.154,1.402)** |  | 1.686  (0.589,4.823) | 1.065  (0.478,2.373) | 0.875  (0.575,1.331) |
| Smoking status (ref = Not current smokers) | |  |  |  |  |  |  |  |  |
| Current smokers | 0.899  (0.802,1.007) | 0.875  (0.759,1.009) |  | **1.131**  **(1.019,1.260)** | 1.095  (0.964,1.244) |  | 1.298  (0.514,3.279) | 1.058  (0.586,1.911) | 1.229  (0.755,2.000) |
| Drinking status (ref = Not current drinkers) | |  |  |  |  |  |  |  |  |
| Current drinkers | 1.060  (0.970,1.159) | **1.167**  **(1.045,1.304)** |  | 0.991  (0.914,1.073) | 0.950  (0.860,1.049) |  | 0.862  (0.385,1.932) | 0.776  (0.469,1.282) | **0.485**  **(0.307,0.767)** |
| Sleep times (ref = 6-8h) | |  |  |  |  |  |  |  |  |
| <6h,>8h | 0.941  (0.868,1.019) | **0.828**  **(0.755,0.907)** |  | **1.195**  **(1.110,1.286)** | **1.216**  **(1.123,1.317)** |  | **2.321**  **(1.135,4.747)** | 0.942  (0.574,1.545) | 1.302  (0.924,1.833) |

Note: Bold fonts data represent statistical significance (*P* ≤ 0.05).

In marital status: * Others include married but not living with spouse temporarily for reasons such as work, separated, divorced, widowed, and never married.

Table S7 Hazard radios and 95% confidence intervals of covariates on transitions among frailty states transitions over 60 years

| Covariates | Recovery transition | |  | Deteriorate transition | |  | Death transition | | |
| --- | --- | --- | --- | --- | --- | --- | --- | --- | --- |
| Prefrailty→Robust | Frailty→Prefrailty |  | Robust→Prefrailty | Prefrailty→Frailty |  | Robust→Death | Prefrailty→Death | Frailty→Death |
| Age, continuous | 1.003  (0.993,1.013) | 0.991  (0.982,1.000) |  | **1.012**  **(1.004,1.021)** | **1.019**  **(1.011,1.027)** |  | **1.110**  **(1.078,1.143)** | **1.092**  **(1.067,1.117)** | **1.107**  **(1.093,1.121)** |
| Gender (ref = Male) | |  |  |  |  |  |  |  |  |
| Female | **0.740**  **(0.632,0.868)** | **0.814**  **(0.698,0.948)** |  | 1.090  (0.946,1.255) | **1.377**  **(1.204,1.575)** |  | 0.568  (0.296,1.092) | 0.745  (0.478,1.163) | **0.464**  **(0.368,0.584)** |
| Residence areas (ref = Urban) | |  |  |  |  |  |  |  |  |
| Rural | **1.353**  **(1.208,1.516)** | **1.162**  **(1.037,1.302)** |  | **1.208**  **(1.093,1.336)** | **1.326**  **(1.207,1.456)** |  | 0.849  (0.508,1.420) | 1.107  (0.818,1.498) | 1.004  (0.844,1.195) |
| Marital status (ref = Married) | |  |  |  |  |  |  |  |  |
| Others* | 1.140  (0.996,1.304) | 0.965  (0.852,1.092) |  | 1.092  (0.966,1.235) | 0.948  (0.851,1.056) |  | 1.025  (0.568,1.850) | **1.414**  **(1.032,1.933)** | **1.301**  **(1.091,1.552)** |
| Highest educational levels (ref = Literate) | | |  |  |  |  |  |  |  |
| Illiterate | **1.650**  **(1.450,1.877)** | **1.129**  **(1.002,1.273)** |  | **1.164**  **(1.035,1.309)** | **1.139**  **(1.026,1.263)** |  | 1.466  (0.854,2.518) | 1.175  (0.829,1.665) | **1.476**  **(1.228,1.775)** |
| Smoking status (ref = Not current smokers) | |  |  |  |  |  |  |  |  |
| Current smokers | 0.934  (0.808,1.081) | **0.845**  **(0.731,0.975)** |  | 1.001  (0.880,1.137) | 1.115  (0.984,1.265) |  | 0.771  (0.435,1.368) | **2.752**  **(1.779,4.257)** | 1.069  (0.866,1.319) |
| Drinking status (ref = Not current drinkers) | |  |  |  |  |  |  |  |  |
| Current drinkers | 1.085  (0.961,1.226) | **1.220**  **(1.075,1.384)** |  | 0.959  (0.858,1.072) | **0.894**  **(0.801,0.997)** |  | 0.972  (0.546,1.728) | **0.675**  **(0.484,0.942)** | **0.708**  **(0.567,0.883)** |
| Sleep times (ref = 6-8h) | |  |  |  |  |  |  |  |  |
| <6h,>8h | 0.903  (0.808,1.009) | **0.889**  **(0.799,0.990)** |  | **1.117**  **(1.010,1.235)** | **1.254**  **(1.146,1.372)** |  | 1.243  (0.718,2.153) | 1.075  (0.791,1.460) | 0.856  (0.724,1.012) |

Note: Bold fonts data represent statistical significance (*P* ≤ 0.05).

In marital status: * Others include married but not living with spouse temporarily for reasons such as work, separated, divorced, widowed, and never married.

Table S8 Hazard radios and 95% confidence intervals of covariates on transitions among frailty states transitions in males

| Covariates | Recovery transition | |  | Deteriorate transition | |  | Death transition | | |
| --- | --- | --- | --- | --- | --- | --- | --- | --- | --- |
| Prefrailty→Robust | Frailty→Prefrailty |  | Robust→Prefrailty | Prefrailty→Frailty |  | Robust→Death | Prefrailty→Death | Frailty→Death |
| Age (≥45), continuous | **0.989**  **(0.984,0.994)** | **0.980**  **(0.974,0.986)** |  | **1.012**  **(1.008,1.017)** | **1.018**  **(1.012,1.023)** |  | **1.089**  **(1.058,1.1210)** | **1.081**  **(1.061,1.100)** | **1.091**  **(1.077,1.105)** |
| Residence areas (ref = Urban) | |  |  |  |  |  |  |  |  |
| Rural | **1.244**  **(1.139,1.360)** | **1.176**  **(1.044,1.324)** |  | **1.162**  **(1.074,1.257)** | **1.325**  **(1.200,1.464)** |  | 0.989  (0.599,1.630) | 1.043  (0.772,1.409) | 0.987  (0.790,1.233) |
| Marital status (ref = Married) | |  |  |  |  |  |  |  |  |
| Others* | **1.145**  **(1.010,1.298)** | 0.908  (0.782,1.053) |  | 0.993  (0.882,1.117) | 1.097  (0.964,1.250) |  | 1.563  (0.889,2.748) | 1.304  (0.918,1.854) | **1.311**  **(1.040,1.652)** |
| Highest educational levels (ref = Literate) | | |  |  |  |  |  |  |  |
| Illiterate | **1.502**  **(1.304,1.730)** | 0.942  (0.803,1.106) |  | **1.197**  **(1.045,1.372)** | **1.202**  **(1.044,1.386)** |  | 0.613  (0.216,1.741) | 1.463  (0.983,2.177) | **1.294**  **(1.020,1.642)** |
| Smoking status (ref = Not current smokers) | |  |  |  |  |  |  |  |  |
| Current smokers | 0.938  (0.846,1.041) | 0.907  (0.792,1.039) |  | **1.101**  **(1.003,1.209)** | **1.169**  **(1.035,1.320)** |  | 0.923  (0.530,1.606) | **1.990**  **(1.235,3.209)** | 1.159  (0.888,1.512) |
| Drinking status (ref = Not current drinkers) | |  |  |  |  |  |  |  |  |
| Current drinkers | 1.057  (0.969,1.154) | 1.116  (0.999,1.247) |  | 0.957  (0.884,1.035) | **0.825**  **(0.751,0.907)** |  | 0.843  (0.515,1.379) | **0.680**  **(0.508,0.911)** | **0.662**  **(0.527,0.833)** |
| Sleep times (ref = 6-8h) | |  |  |  |  |  |  |  |  |
| <6h,>8h | 0.997  (0.911,1.091) | **0.867**  **(0.777,0.967)** |  | **1.149**  **(1.057,1.248)** | **1.214**  **(1.104,1.334)** |  | **1.876**  **(1.085,3.243)** | 1.042  (0.761,1.426) | 0.965  (0.783,1.190) |

Note: Bold fonts data represent statistical significance (*P*≤0.05).

In marital status: *Others include Married but not living with spouse temporarily for reasons such as work, Separated, Divorced, Widowed, and Never married.

Table S9 Hazard radios and 95% confidence intervals of covariates on transitions among frailty states transitions in females

| Covariates | Recovery transition | |  | Deteriorate transition | |  | Death transition | | |
| --- | --- | --- | --- | --- | --- | --- | --- | --- | --- |
| Prefrailty→Robust | Frailty→Prefrailty |  | Robust→Prefrailty | Prefrailty→Frailty |  | Robust→Death | Prefrailty→Death | Frailty→Death |
| Age (≥45), continuous | **0.987**  **(0.981,0.992)** | **0.990**  **(0.984,0.995)** |  | **1.007**  **(1.003,1.012)** | **1.020**  **(1.015,1.025)** |  | **1.104**  **(1.047,1.164)** | **1.112**  **(1.071,1.154)** | **1.102**  **(1.086,1.118)** |
| Residence areas (ref = Urban) | |  |  |  |  |  |  |  |  |
| Rural | **1.201**  **(1.093,1.320)** | 1.012  (0.918,1.114) |  | **1.183**  **(1.086,1.288)** | **1.333**  **(1.228,1.447)** |  | 0.916  (0.389,2.159) | 1.095  (0.679,1.765) | 0.958  (0.766,1.197) |
| Marital status (ref = Married) | |  |  |  |  |  |  |  |  |
| Others* | 0.935  (0.831,1.052) | 0.898  (0.806,1.000) |  | 1.076  (0.964,1.202) | 0.939  (0.854,1.032) |  | 0.884  (0.240,3.257) | 1.239  (0.722,2.127) | **1.288**  **(1.034,1.605)** |
| Highest educational levels (ref = Literate) | | |  |  |  |  |  |  |  |
| Illiterate | **1.377**  **(1.245,1.522)** | 1.042  (0.950,1.145) |  | 1.034  (0.941,1.136) | **1.205**  **(1.109,1.310)** |  | 2.636  (0.750,9.268) | 0.893  (0.497,1.603) | **1.474**  **(1.160,1.872)** |
| Smoking status (ref = Not current smokers) | |  |  |  |  |  |  |  |  |
| Current smokers | **0.804**  **(0.671,0.964)** | **0.807**  **(0.692,0.941)** |  | 0.996  (0.843,1.176) | 1.051  (0.921,1.201) |  | 0.830  (0.121,5.696) | **2.002**  **(1.094,3.667)** | 1.073  (0.800,1.440) |
| Drinking status (ref = Not current drinkers) | |  |  |  |  |  |  |  |  |
| Current drinkers | 1.102  (0.969,1.253) | **1.296**  **(1.138,1.477)** |  | 1.041  (0.927,1.170) | 1.087  (0.968,1.220) |  | 0.667  (0.081,5.507) | 1.121  (0.556,2.261) | **0.577**  **(0.374,0.890)** |
| Sleep times (ref = 6-8h) | |  |  |  |  |  |  |  |  |
| <6h,>8h | **0.859**  **(0.782,0.943)** | **0.844**  **(0.771,0.923)** |  | **1.167**  **(1.071,1.272)** | **1.243**  **(1.151,1.343)** |  | 1.715  (0.548,5.373) | 0.871  (0.513,1.479) | 0.909  (0.727,1.136) |

Note: Bold fonts data represent statistical significance (*P* ≤ 0.05).

In marital status: * Others include married but not living with spouse temporarily for reasons such as work, separated, divorced, widowed, and never married.


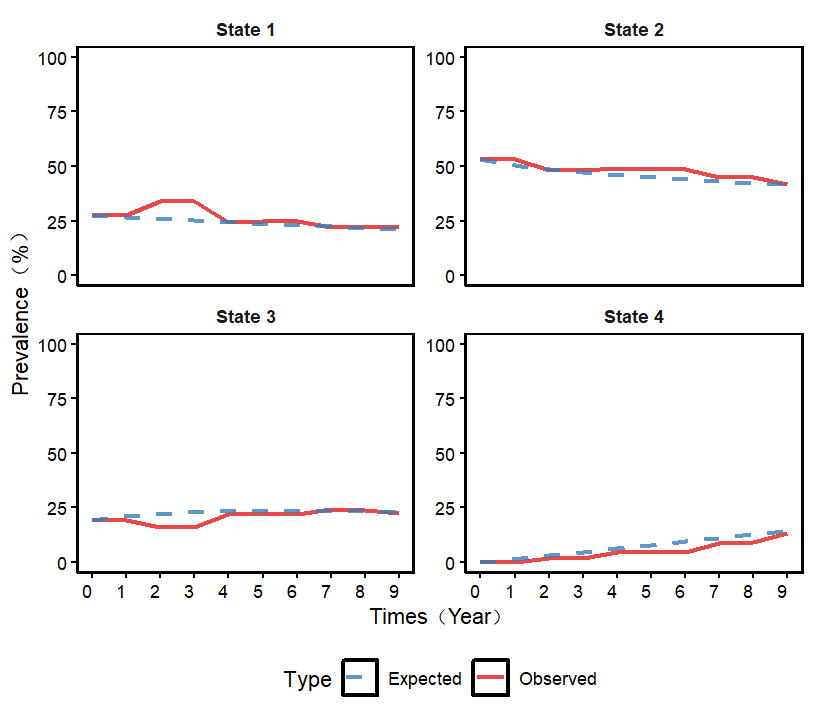


Figure S1 Multi-state Markov model evaluation diagrams

Note: Comparison of observed and expected prevalence.

State 1: robust. State 2: prefrailty. State 3: frailty. State 4: death.

The horizontal axis is time, the vertical axis is the expected frequency percentage and observed frequency percentage, and the dashed and solid lines were the curves of the expected frequency percentage and observed frequency percentage for the four states of robust, prefrailty, frailty and death.
